# Supplementary material for: Factors Associated with Engagement in University Life, and Help Seeking Attitudes and Behaviour in First Year Undergraduate Students
Source: MDPI journal article supplement (doi:10.3390/ijerph20010120), 2022-12-22
Supplement: s1 [file s1]

**Table S1.** Measures captured at each wave

|                                                                                      | Wave 1 | Wave 2 | Wave 3 | Wave 4 |
|--------------------------------------------------------------------------------------|--------|--------|--------|--------|
| Demographics (age, gender, domestic student etc).                                    | X      |        |        |        |
| Employment                                                                           | X      | X      | X      | X      |
| Financial stress                                                                     | X      | X      | X      | X      |
| Responsibilities                                                                     | X      |        |        |        |
| Relationship status                                                                  | X      |        |        | X      |
| Degree of study                                                                      | X      |        |        |        |
| Study load                                                                           | X      |        |        |        |
| Study load change                                                                    |        | X      | X      | X      |
| Online classes                                                                       |        | X      | X      | X      |
| Time of semester (teaching vs not teaching period)                                   |        | X      | X      | X      |
| Challenges                                                                           | X      | X      | X      | X      |
| Stigma/disclosure in a university environment                                        | X      |        |        | X      |
| Help seeking knowledge                                                               | X      |        |        | X      |
| Mental illness diagnosis                                                             | X      |        |        |        |
| Disability (days out of role, days cut back)                                         | X      | X      | X      | X      |
| Depression symptoms (PHQ-9)                                                          | X      | X      | X      | X      |
| GAD symptoms (GAD-7)                                                                 | X      | X      | X      | X      |
| Social Anxiety (Social Anxiety Disorder Screener)                                    | X      | X      | X      | X      |
| Distress (DQ5)                                                                       | X      | X      | X      | X      |
| Wellbeing (WHO-5)                                                                    | X      | X      | X      | X      |
| Alcohol consumption (AUDIT-C)                                                        | X      | X      | X      | X      |
| Stigma (Depression stigma scale)                                                     | X      |        |        |        |
| Loneliness (De Jong Gierveld Loneliness Scale)                                       | X      | X      | X      | X      |
| Engagement with university life                                                      |        | X      | X      | X      |
| Belonging (INQ-Belong)                                                               | X      | X      | X      | X      |
| Social support (Schuster Social Support Scale)                                       | X      | X      | X      | X      |
| Personality (BFI-10)                                                                 | X      |        |        |        |
| Academic self-efficacy (College Self-Efficacy Inventory (study and social subscales) | X      | X      | X      | X      |
| Functioning (Re-QoL)                                                                 | X      | X      | X      | X      |
| Attitudes toward professional psychological treatment (ATSPPH-SF)                    | X      |        |        | X      |
| Help seeking (GHSQ)                                                                  | X      | X      | X      | X      |
| COVID impacts (WSAS)                                                                 | X      |        |        |        |
| Social media use (Bergen Facebook Addiction Scale)                                   | X      | X      | X      | X      |
| Willingness to participate in future research                                        |        |        |        | X      |
